# Supplementary material
Source: PubMed Central journal article supplement (PMC7357479)
Supplement: AEM.00250-20-s0001.pdf [file AEM.00250-20-s0001.pdf]

**Supplemental Fig 1**

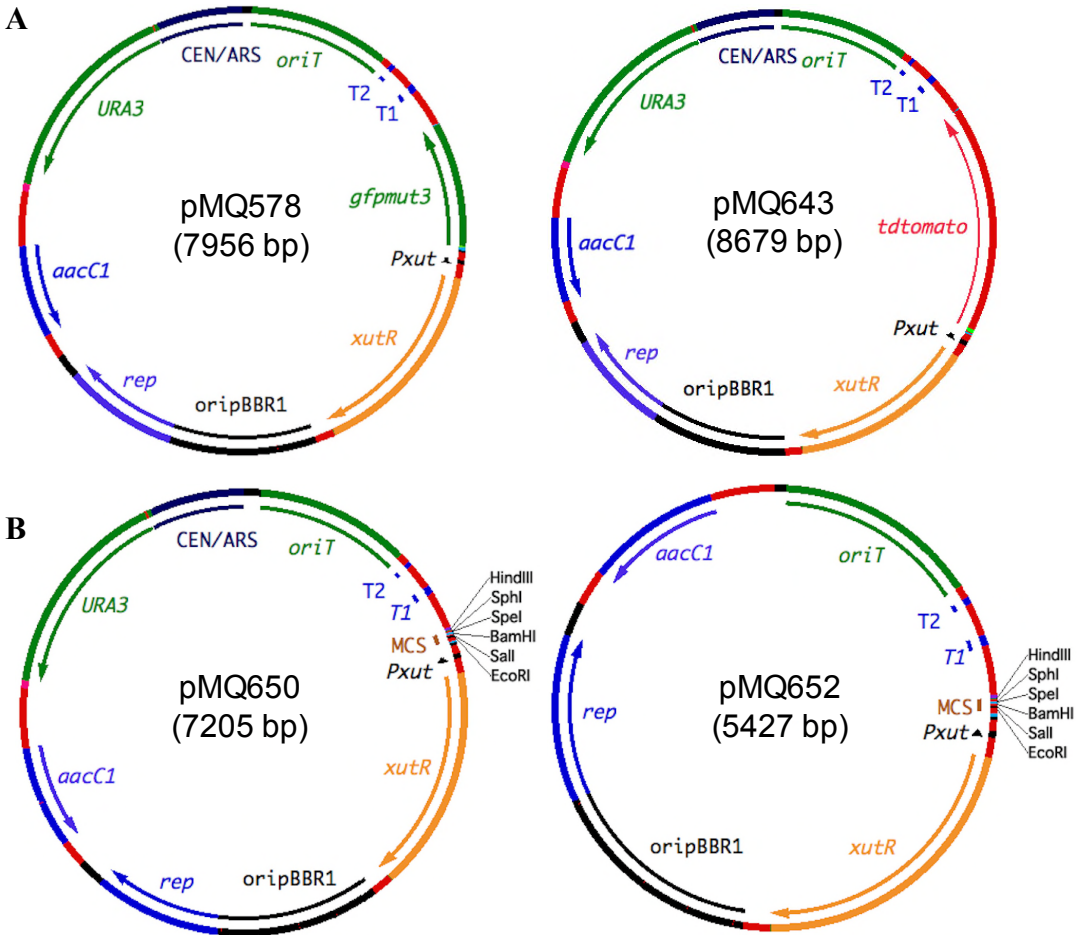

**Figure S1. Schematic diagrams of major plasmids made for this study.** (A) Plasmids for xylose-inducible expression of fluorescent proteins. (B) Plasmids with *P<sub>xut</sub>* and a multicloning site (MCS) with restriction sites to facilitate cloning.

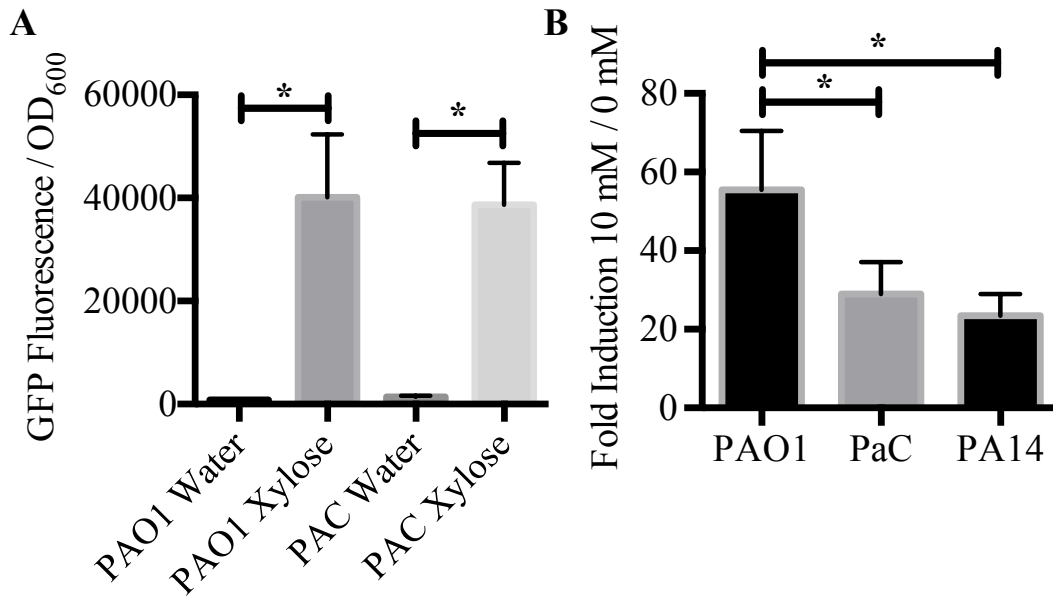

**Figure S2.  $P_{xut}$  promoter is inducible in additional *P. aeruginosa* strains at 30°C.** Bacteria with pMQ578 were grown overnight in LB broth, washed, and adjusted to OD<sub>600</sub>=2.0 in PBS with xylose at 10 mM or an equal volume of water as a negative control. GFP fluorescence and culture optical density was measured at 20 h. Mean and SD are shown, n=6 independent cultures. Asterisks indicate significant differences by ANOVA with Tukey's post-test (p<0.05). Normalized fluorescence for cultures (A) and fold induction of normalized fluorescence of induced versus uninduced cultures (B) are shown.  $P_{xut}$  was induced in a variety of *P. aeruginosa* strains and was more highly induced in strain PAO1 than PAC and PA14.

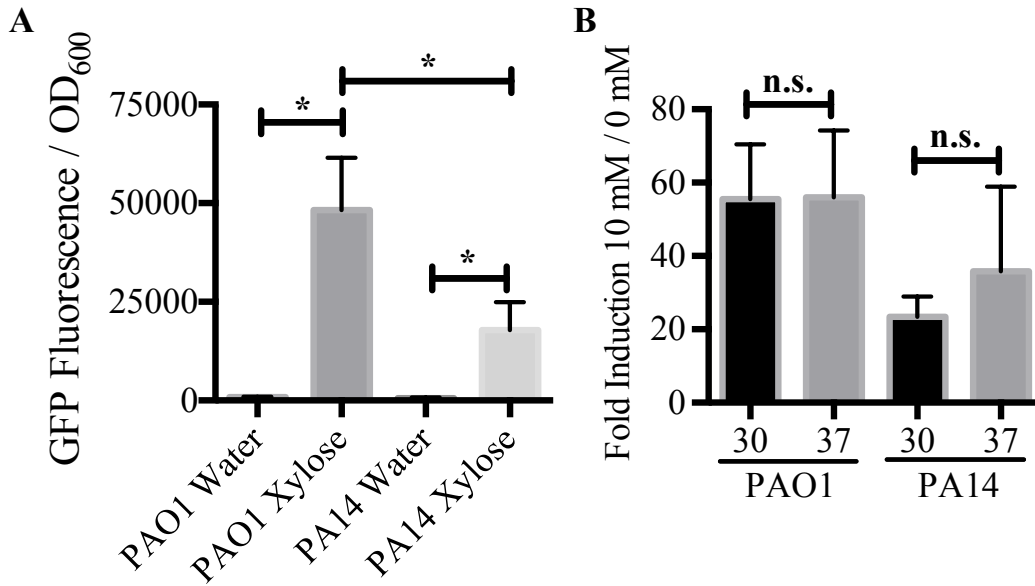

**Figure S3. Use of  $P_{xut}$  promoter in *P. aeruginosa* strains at 37°C and comparison of expression at 30°C.** Bacteria with pMQ578 were grown overnight in LB broth at the indicated temperature, washed, and adjusted to  $OD_{600}=2.0$  in PBS with xylose at 10 mM or an equal volume of water as a negative control. GFP fluorescence and culture optical density was measured at 20 h. Mean and SD are shown,  $n=6$  independent cultures. Normalized fluorescence for cultures grown at 37°C (**A**) and fold induction of normalized fluorescence of induced versus uninduced cultures (**B**) are depicted. The asterisks indicate significant differences by ANOVA with Tukey's post-test ( $p<0.05$ ). n.s. is an abbreviation for not significant. Some data from panel B was also shown in Figure S2B.  $P_{xut}$  was more highly inducible in strain PAO1 than PA14.  $P_{xut}$  and  $P_{BAD}$  were indistinguishable in *P. aeruginosa*. The pMQ578 plasmid has  $P_{xut}$ -*gfp*, and pMQ630 has  $P_{BAD}$ -*gfp*.
